# Supplementary material for: Ultrafast formation of ZnO mesocrystals with excellent photocatalytic activities by a facile Tris-assisted antisolvent process
Source: Royal Society of Chemistry journal article supplement (doi:10.1039/c1ce05503h), 2011-01-01
Supplement: c1ce05503h.pdf [file c1ce05503h.pdf]

Supporting Information for

**Ultrafast Formation of ZnO Mesocrystals of Excellent  
Photocatalytic Activities from a Facile Tris-Assisted  
Antisolvent Process**

Ji-Yao Dong,<sup>a</sup> Wei-Hao Lin,<sup>b</sup> Yung-Jung Hsu,<sup>b</sup> David Shan-Hill Wong,<sup>\*a</sup> and  
Shih-Yuan Lu<sup>\*a</sup>

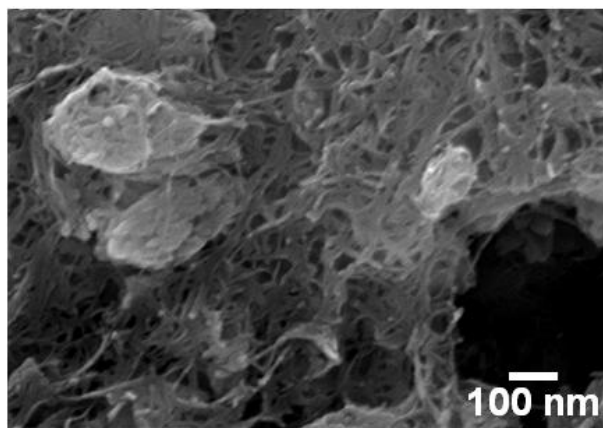

**Fig. S1** SEM image of ZnO product obtained with Tris of 5 mM.
